# Supplementary material
Source: PubMed Central journal article supplement (PMC4754139)

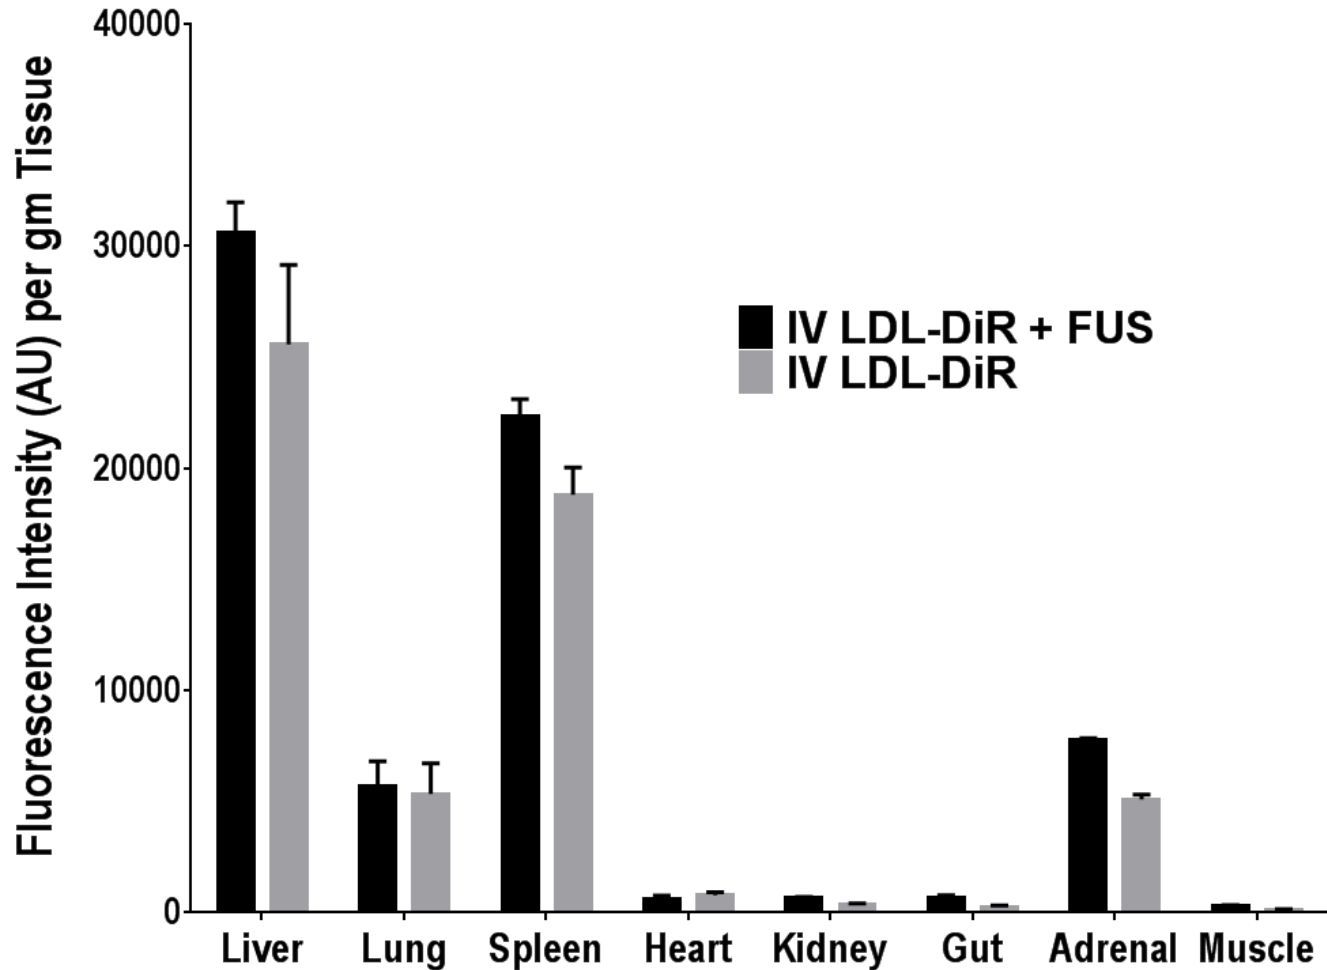

Supplement: NIHMS749936-supplement-3.pdf [file NIHMS749936-supplement-3.pdf]

A.

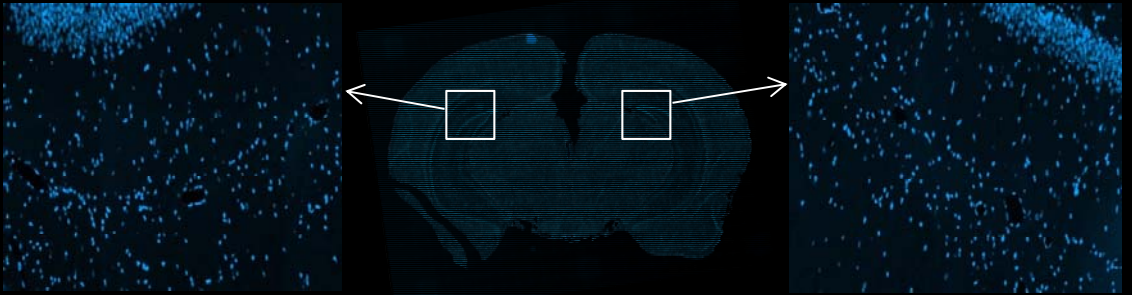

B.

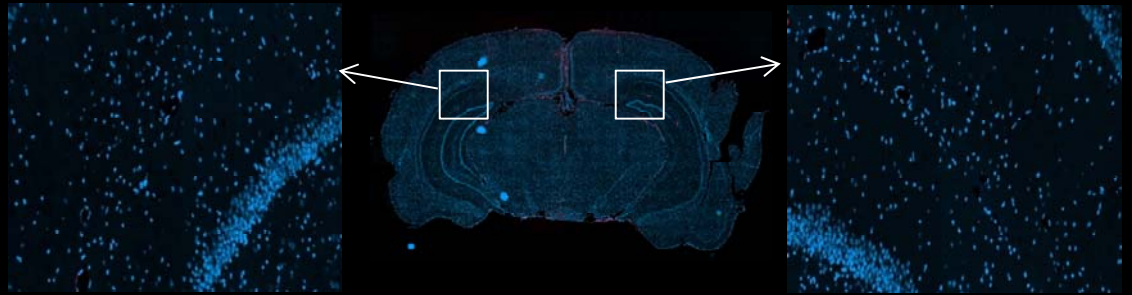

C.

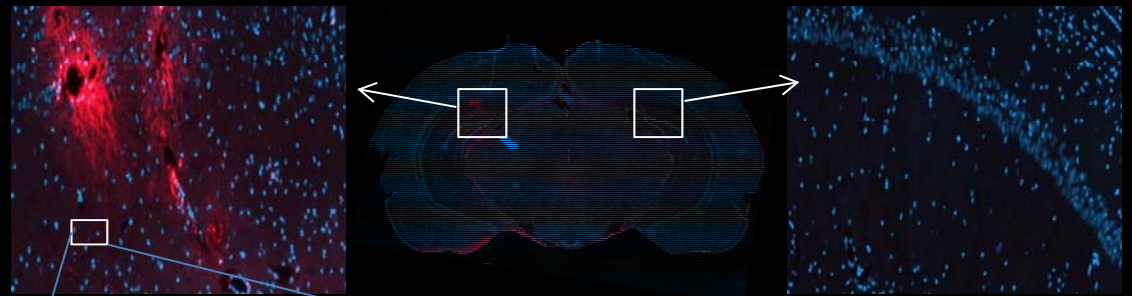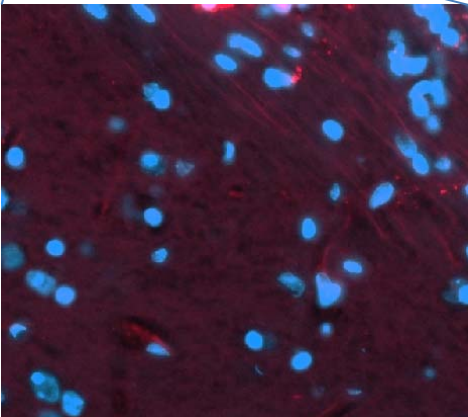

Supplement: NIHMS749936-supplement-4.pdf [file NIHMS749936-supplement-4.pdf]
